# Supplementary material for: Municipality Data as a Rapid and Effective Tool to Analyse Spatial and Temporal Variations of All-Cause Mortality by Town District: The Experience in Genoa (Italy)
Source: MDPI journal article supplement (doi:10.3390/ijerph18168250), 2021-08-04
Supplement: s1 [file s1]

**Table S1.** Comparison of some indicators (Genoa vs. Italy).

| Indicators                                  | Genoa | Italy |
|---------------------------------------------|-------|-------|
| Old Age Index                               | 264.0 | 184.1 |
| Structural Dependency Index                 | 65.6  | 56.9  |
| Turnover Index of the Active Population     | 167.8 | 139.1 |
| Structure Index of the Active Population    | 158.9 | 141.5 |
| Burden Index of Children per Fertile Woman  | 17.1  | 18.2  |
| Average Age*                                | 49.2  | 46.0  |
| Birth Rate (per 10,000 population)*         | 58.0  | 68.0  |
| Raw Mortality Rate (per 10,000 population)* | 177.0 | 126.0 |
| Life Expectancy at Birth*                   | 81.4  | 82.0  |
| Life Expectancy at 65 Years*                | 19.4  | 19.9  |

Note: \* indicates data referring to the entire province of Genoa in 2020 rather than only the municipality.

The Old Age Index in 2021 for the municipality of Genoa indicates the presence of 264.0 elderly people for every 100 young people, clearly more than in the Italian population. Also the Structural Dependency Index is higher in Genoa than in the whole country: in 2021 in the city there are 65.6 dependent individuals for every 100 who work, while in Italy this figure is 56.9. The Turnover Index of the Active Population in Genoa in 2021 is 167.8; this indicates that the population of working age is very old, even more so than in Italy as a whole (139.1). Similarly, the Structure Index of the Active Population is higher in Genoa (158.9) than in Italy (141.5). The Burden Index of Children per Fertile Woman in Genoa is 17.1, lower than the Italian index (18.2). The Birth Rate, which in Italy in 2020 was already low (annual average 68 births per 10,000 inhabitants), was even lower in the province of Genoa (58). Conversely, the Raw Mortality Rate is higher in Genoa than in Italy (177 versus 126). The Average Age of the Genoa population is greater than that in Italy: 49.2 versus 46 years. Lastly, the Life Expectancy for the population of the province of Genoa is slightly lower than that of Italy, both at birth and at 65 years.

Table S2. Demographic indicators of the 25 districts of Genoa.

| DISTRICT NUMBER | DISTRICT NAME         | SURFACE (km <sup>2</sup> ) | RESIDENTS (average 2009-2020) | POPULATION DENSITY (Res/km <sup>2</sup> ) | % over 65 |
|-----------------|-----------------------|----------------------------|-------------------------------|-------------------------------------------|-----------|
| 1               | VOLTRI                | 41.19                      | 12,522                        | 304                                       | 23%       |
| 2               | PRA'                  | 11.96                      | 20,695                        | 1,730                                     | 20%       |
| 3               | PEGLI                 | 24.39                      | 26,596                        | 1,090                                     | 23%       |
| 4               | SESTRI                | 17.03                      | 45,303                        | 2,660                                     | 22%       |
| 5               | RIVAROLO              | 12.29                      | 33,863                        | 2,755                                     | 19%       |
| 6               | BOLZANETO             | 13.74                      | 14,884                        | 1,083                                     | 20%       |
| 7               | PONTEDECIMO           | 7.21                       | 12,421                        | 1,723                                     | 19%       |
| 8               | CORNIGLIANO           | 5.20                       | 15,098                        | 2,903                                     | 17%       |
| 9               | SAMPIERDARENA         | 5.01                       | 44,222                        | 8,827                                     | 19%       |
| 10              | S.TEODORO             | 2.37                       | 21,964                        | 9,268                                     | 21%       |
| 11              | OREGINA-LAGACCIO      | 2.75                       | 24,504                        | 8,910                                     | 21%       |
| 12              | PRE-MOLO-MADDALENA    | 1.54                       | 23,892                        | 15,514                                    | 12%       |
| 13              | CASTELLETTO           | 1.99                       | 28,142                        | 14,142                                    | 22%       |
| 14              | PORTORIA              | 1.44                       | 12,598                        | 8,749                                     | 23%       |
| 15              | FOCE                  | 1.19                       | 15,620                        | 13,126                                    | 24%       |
| 16              | S.FRUTTUOSO           | 2.10                       | 35,031                        | 16,681                                    | 24%       |
| 17              | MARASSI               | 5.83                       | 40,067                        | 6,873                                     | 22%       |
| 18              | STAGLIENO             | 6.03                       | 20,943                        | 3,473                                     | 21%       |
| 19              | MOLASSANA             | 16.62                      | 25,190                        | 1,516                                     | 21%       |
| 20              | STRUPPA               | 19.14                      | 10,151                        | 530                                       | 21%       |
| 21              | VALLE STURLA          | 13.52                      | 14,635                        | 1,082                                     | 22%       |
| 22              | S.MARTINO             | 1.84                       | 15,155                        | 8,236                                     | 23%       |
| 23              | ALBARO                | 3.00                       | 28,748                        | 9,583                                     | 25%       |
| 24              | QUARTO                | 4.44                       | 29,648                        | 6,677                                     | 24%       |
| 25              | NERVI-QUINTO-S.ILARIO | 18.67                      | 19,203                        | 1,029                                     | 24%       |
|                 | <b>GENOA TOWN</b>     | <b>240.49</b>              | <b>591,095</b>                | <b>2,458</b>                              |           |

**Table S3.** SMRs (males) in the 25 districts of Genoa, 2009-2020, with 90% CIs.

| <b>DISTRICT</b>       | <b>OBSERVED<br/>CASES</b> | <b>EXPECTED<br/>CASES</b> | <b>SMR</b> | <b>90% CI</b> |
|-----------------------|---------------------------|---------------------------|------------|---------------|
| CORNIGLIANO           | 1207                      | 969.9                     | 124.4      | 118.7-130.5   |
| PRA'                  | 1759                      | 1418.2                    | 124.0      | 119.3-129.0   |
| PRE-MOLO-MADDALENA    | 1364                      | 1193.4                    | 114.3      | 109.3-119.5   |
| STRUPPA               | 895                       | 786.7                     | 113.8      | 107.7-120.2   |
| BOLZANETO             | 1190                      | 1056.5                    | 112.6      | 107.4-118.1   |
| RIVAROLO              | 2564                      | 2288.5                    | 112.0      | 108.5-115.7   |
| VOLTRI                | 1126                      | 1045.9                    | 107.7      | 102.5-113.1   |
| SESTRI                | 3788                      | 3532.6                    | 107.2      | 104.4-110.1   |
| OREGINA LAGACCIO      | 1905                      | 1841.3                    | 103.5      | 99.6-107.4    |
| PONTEDECIMO           | 928                       | 910.2                     | 102.0      | 96.6-107.6    |
| STAGLIENO             | 1559                      | 1531.1                    | 101.8      | 97.7-106.2    |
| S.FRUTTUOSO           | 2920                      | 2877.1                    | 101.5      | 98.4-104.6    |
| MOLASSANA             | 1948                      | 1921.8                    | 101.4      | 97.7-105.2    |
| S.TEODORO             | 1718                      | 1704                      | 100.8      | 96.9-104.9    |
| SAMPIERDARENA         | 3173                      | 3158.3                    | 100.5      | 97.6-103.4    |
| MARASSI               | 3135                      | 3205.3                    | 97.8       | 95.0-100.7    |
| VALLE STURLA          | 1067                      | 1135.3                    | 94.0       | 89.4-98.8     |
| CASTELLETTO           | 2174                      | 2331.4                    | 93.2       | 90.0-96.6     |
| PEGLI                 | 2157                      | 2334                      | 92.4       | 89.2-95.7     |
| QUARTO                | 2409                      | 2660.3                    | 90.6       | 87.6-93.6     |
| FOCE                  | 1196                      | 1324.9                    | 90.3       | 86.1-94.7     |
| NERVI-QUINTO-S.ILARIO | 1473                      | 1670.2                    | 88.2       | 84.5-92.1     |
| S.MARTINO             | 1115                      | 1265.1                    | 88.1       | 83.9-92.6     |
| PORTORIA              | 968                       | 1101.3                    | 87.9       | 83.4-92.7     |
| ALBARO                | 2159                      | 2633.2                    | 82.0       | 79.1-84.9     |
| <b>GENOA</b>          | <b>45897</b>              | <b>45897</b>              | <b>100</b> |               |

**Table S4.** SMRs (females) in the 25 districts of Genoa, 2009-2020, with 90% CIs.

| <b>DISTRICT</b>       | <b>OBSERVED<br/>CASES</b> | <b>EXPECTED<br/>CASES</b> | <b>SMR</b> | <b>90% CI</b> |
|-----------------------|---------------------------|---------------------------|------------|---------------|
| CORNIGLIANO           | 1525                      | 1143.2                    | 133.4      | 127.9-139.1   |
| RIVAROLO              | 3118                      | 2605.1                    | 119.7      | 116.2-123.3   |
| STRUPPA               | 1023                      | 893.2                     | 114.5      | 108.8-120.6   |
| S.FRUTTUOSO           | 4392                      | 3873.6                    | 113.4      | 110.6-116.2   |
| BOLZANETO             | 1304                      | 1166                      | 111.8      | 106.9-117.1   |
| CASTELLETTO           | 3430                      | 3104.2                    | 110.5      | 107.4-113.6   |
| PRA'                  | 1738                      | 1622.5                    | 107.1      | 103.0-111.4   |
| PRE-MOLO-MADDALENA    | 1327                      | 1239.8                    | 107.0      | 102.3-112.0   |
| OREGINA LAGACCIO      | 2307                      | 2229.2                    | 103.5      | 100.0-107.1   |
| SESTRI                | 4237                      | 4163.8                    | 101.8      | 99.2-104.4    |
| SAMPIERDARENA         | 3615                      | 3612.2                    | 100.1      | 97.4-102.9    |
| PONTEDECIMO           | 1007                      | 1010.9                    | 99.6       | 94.6-104.9    |
| VOLTRI                | 1159                      | 1164.8                    | 99.5       | 94.8-104.4    |
| PORTORIA              | 1244                      | 1300.3                    | 95.7       | 91.3-100.2    |
| QUARTO                | 2826                      | 2971.8                    | 95.1       | 92.2-98.1     |
| MOLASSANA             | 1918                      | 2041.8                    | 93.9       | 90.5-97.5     |
| S.MARTINO             | 1401                      | 1494.7                    | 93.7       | 89.7-97.9     |
| PEGLI                 | 2379                      | 2582.3                    | 92.1       | 89.1-95.3     |
| S.TEODORO             | 1711                      | 1860                      | 92.0       | 88.4-95.7     |
| STAGLIENO             | 1572                      | 1727.2                    | 91.0       | 87.3-94.9     |
| MARASSI               | 3225                      | 3569.1                    | 90.4       | 87.8-93.0     |
| FOCE                  | 1515                      | 1680.6                    | 90.1       | 86.4-94.0     |
| VALLE STURLA          | 1153                      | 1323.6                    | 87.1       | 83.0-91.4     |
| ALBARO                | 2953                      | 3414.2                    | 86.5       | 83.9-89.2     |
| NERVI-QUINTO-S.ILARIO | 1697                      | 1982                      | 85.6       | 82.3-89.1     |
| <b>GENOA</b>          | <b>53776</b>              | <b>53776</b>              | <b>100</b> |               |

**Table S5.** Annual SRDs (males) in the 25 districts and the whole city of Genoa.

|                       | 2009          | 2010          | 2011          | 2012          | 2013          | 2014          | 2015          | 2016          | 2017          | 2018          | 2019          | 2020          |
|-----------------------|---------------|---------------|---------------|---------------|---------------|---------------|---------------|---------------|---------------|---------------|---------------|---------------|
| BOLZANETO             | 130.52        | 111.60        | 138.22        | 156.56        | 163.54        | 107.31        | 139.06        | 121.77        | 116.76        | 92.76         | 110.57        | 149.52        |
| CASTELLETTO           | 108.26        | 122.72        | 108.69        | 99.82         | 103.22        | 92.98         | 106.57        | 100.75        | 106.65        | 95.95         | 92.59         | 119.54        |
| CORNIGLIANO           | 141.25        | 154.76        | 155.08        | 139.70        | 144.58        | 150.69        | 140.00        | 137.03        | 154.33        | 103.31        | 121.96        | 169.08        |
| FOCE                  | 124.77        | 113.60        | 104.80        | 111.93        | 90.56         | 99.57         | 109.60        | 89.06         | 97.93         | 73.12         | 111.82        | 105.69        |
| MARASSI               | 133.24        | 111.66        | 126.54        | 117.01        | 101.31        | 99.67         | 101.86        | 109.74        | 112.81        | 102.39        | 99.72         | 127.22        |
| MOLASSANA             | 125.89        | 114.11        | 119.05        | 120.17        | 121.26        | 104.16        | 120.68        | 93.41         | 109.27        | 119.96        | 108.07        | 123.18        |
| NERVI-QUINTO-S.ILARIO | 101.76        | 112.04        | 103.61        | 94.06         | 98.72         | 89.42         | 97.36         | 94.18         | 99.19         | 104.43        | 112.02        | 112.62        |
| OREGINA LAGACCIO      | 119.83        | 120.13        | 128.49        | 117.01        | 111.60        | 121.42        | 130.23        | 101.07        | 128.20        | 117.06        | 94.18         | 129.18        |
| PEGLI                 | 115.57        | 114.82        | 110.00        | 112.44        | 105.94        | 104.73        | 97.37         | 93.18         | 94.90         | 87.60         | 103.41        | 121.16        |
| PONTEDECIMO           | 104.80        | 129.92        | 123.02        | 111.54        | 102.78        | 107.88        | 107.51        | 111.54        | 117.78        | 110.28        | 107.36        | 150.74        |
| PORTORIA              | 110.85        | 88.64         | 106.85        | 103.48        | 110.79        | 95.89         | 96.52         | 77.54         | 94.01         | 97.02         | 102.68        | 139.69        |
| PRA                   | 145.27        | 138.65        | 147.14        | 134.25        | 141.86        | 143.34        | 146.73        | 136.96        | 142.67        | 129.47        | 117.71        | 141.09        |
| PRE-MOLO-MADDALENA    | 154.13        | 137.02        | 122.94        | 130.06        | 133.40        | 117.33        | 135.79        | 126.55        | 133.91        | 119.32        | 102.10        | 146.50        |
| QUARTO                | 112.72        | 109.52        | 108.15        | 105.07        | 112.50        | 85.62         | 89.24         | 98.24         | 98.80         | 94.03         | 85.08         | 120.81        |
| RIVAROLO              | 116.13        | 140.97        | 131.90        | 141.62        | 141.41        | 106.57        | 123.97        | 116.90        | 125.61        | 123.29        | 113.70        | 139.59        |
| S.FRANC.D'ALBARO      | 97.05         | 95.65         | 94.51         | 95.82         | 98.08         | 81.45         | 96.49         | 82.42         | 86.72         | 80.76         | 87.48         | 107.75        |
| S.FRUTTUOSO           | 121.19        | 122.75        | 101.26        | 112.65        | 109.25        | 113.09        | 113.23        | 106.70        | 104.66        | 112.06        | 111.00        | 147.96        |
| S.MARTINO             | 102.51        | 114.19        | 92.00         | 106.40        | 100.82        | 113.98        | 75.98         | 96.69         | 110.78        | 103.88        | 82.80         | 102.29        |
| S.TEODORO             | 122.38        | 113.45        | 117.32        | 144.70        | 138.54        | 137.11        | 112.86        | 97.01         | 97.58         | 93.66         | 86.05         | 122.48        |
| SAMPIERDARENA         | 122.42        | 111.94        | 107.78        | 118.52        | 110.77        | 111.62        | 116.33        | 104.04        | 122.64        | 93.48         | 104.44        | 140.14        |
| SESTRI                | 136.71        | 105.16        | 125.89        | 135.47        | 126.87        | 110.35        | 110.38        | 121.89        | 112.69        | 121.13        | 105.82        | 150.14        |
| STAGLIENO             | 126.20        | 106.47        | 136.08        | 122.15        | 96.23         | 110.30        | 120.36        | 126.94        | 114.39        | 96.06         | 100.75        | 122.83        |
| STRUPPA               | 117.51        | 115.28        | 108.54        | 130.67        | 127.24        | 122.76        | 115.69        | 112.47        | 163.44        | 167.87        | 139.96        | 127.12        |
| VALLE STURLA          | 118.62        | 120.77        | 106.72        | 99.38         | 109.87        | 99.58         | 89.96         | 111.77        | 120.16        | 98.55         | 93.63         | 109.15        |
| VOLTRI                | 129.34        | 135.86        | 131.32        | 156.30        | 156.09        | 113.84        | 103.54        | 99.28         | 101.85        | 113.26        | 123.04        | 126.19        |
| <b>GENOA</b>          | <b>121.33</b> | <b>115.94</b> | <b>116.58</b> | <b>117.73</b> | <b>115.00</b> | <b>106.56</b> | <b>110.51</b> | <b>105.56</b> | <b>112.13</b> | <b>104.25</b> | <b>102.76</b> | <b>130.20</b> |

**Table S6.** Annual SRDs (females) in the 25 districts and the whole city of Genoa.

|                       | 2009         | 2010         | 2011         | 2012         | 2013         | 2014         | 2015         | 2016         | 2017         | 2018         | 2019         | 2020         |
|-----------------------|--------------|--------------|--------------|--------------|--------------|--------------|--------------|--------------|--------------|--------------|--------------|--------------|
| BOLZANETO             | 82.76        | 99.24        | 80.78        | 100.52       | 75.42        | 85.76        | 95.03        | 86.85        | 80.17        | 82.44        | 66.08        | 82.16        |
| CASTELLETTO           | 82.52        | 71.16        | 74.08        | 80.47        | 79.06        | 71.55        | 69.89        | 70.70        | 72.26        | 75.06        | 75.50        | 94.90        |
| CORNIGLIANO           | 108.05       | 107.69       | 93.29        | 90.27        | 94.11        | 93.35        | 100.63       | 93.50        | 92.71        | 107.71       | 87.51        | 110.84       |
| FOCE                  | 65.27        | 72.59        | 70.48        | 64.14        | 69.05        | 48.45        | 74.89        | 63.40        | 57.82        | 64.13        | 64.46        | 60.99        |
| MARASSI               | 67.84        | 66.29        | 75.20        | 73.21        | 63.48        | 64.75        | 67.94        | 66.22        | 61.03        | 62.53        | 61.30        | 72.43        |
| MOLASSANA             | 69.57        | 69.17        | 72.37        | 74.76        | 62.73        | 57.47        | 69.45        | 70.91        | 71.54        | 71.05        | 65.15        | 78.48        |
| NERVI-QUINTO-S.ILARIO | 60.22        | 64.67        | 63.50        | 60.98        | 63.59        | 53.90        | 58.95        | 65.93        | 56.61        | 63.29        | 55.68        | 66.69        |
| OREGINA LAGACCIO      | 70.14        | 78.00        | 71.19        | 77.95        | 73.02        | 61.16        | 83.73        | 81.81        | 80.14        | 76.54        | 67.58        | 80.60        |
| PEGLI                 | 72.83        | 64.03        | 65.61        | 75.37        | 65.49        | 61.09        | 59.95        | 65.98        | 62.32        | 62.91        | 58.72        | 72.07        |
| PONTEDECIMO           | 89.25        | 74.75        | 79.08        | 73.92        | 70.78        | 49.27        | 74.94        | 72.68        | 57.19        | 69.17        | 73.80        | 80.26        |
| PORTORIA              | 71.67        | 76.15        | 64.09        | 73.64        | 67.94        | 60.75        | 59.83        | 56.96        | 63.72        | 59.80        | 75.48        | 72.74        |
| PRA                   | 85.81        | 83.28        | 86.09        | 76.07        | 74.66        | 77.17        | 87.43        | 77.77        | 69.26        | 69.10        | 69.52        | 92.75        |
| PRE-MOLO-MADDALENA    | 72.77        | 86.29        | 77.38        | 82.49        | 73.43        | 69.68        | 72.67        | 82.51        | 74.58        | 78.13        | 88.77        | 87.21        |
| QUARTO                | 78.40        | 80.50        | 62.20        | 64.23        | 66.85        | 70.66        | 71.71        | 57.44        | 64.36        | 65.84        | 61.14        | 75.98        |
| RIVAROLO              | 90.09        | 81.52        | 87.66        | 86.02        | 86.50        | 75.79        | 94.89        | 79.51        | 77.13        | 89.65        | 81.68        | 105.88       |
| S.FRANC.D'ALBARO      | 65.67        | 71.33        | 61.56        | 58.16        | 55.75        | 62.79        | 66.37        | 51.20        | 57.84        | 55.65        | 65.06        | 60.54        |
| S.FRUTTUOSO           | 88.59        | 93.03        | 90.02        | 85.89        | 77.23        | 77.91        | 73.43        | 80.06        | 72.13        | 80.40        | 69.99        | 103.24       |
| S.MARTINO             | 72.77        | 70.09        | 80.33        | 74.40        | 59.08        | 67.91        | 58.05        | 55.50        | 79.63        | 72.41        | 52.09        | 65.64        |
| S.TEODORO             | 82.25        | 75.55        | 70.89        | 62.97        | 77.41        | 62.98        | 69.90        | 53.97        | 72.12        | 66.41        | 49.05        | 82.03        |
| SAMPIERDARENA         | 77.82        | 85.98        | 74.54        | 71.29        | 74.01        | 74.77        | 66.57        | 73.26        | 72.53        | 66.99        | 65.45        | 78.51        |
| SESTRI                | 77.63        | 76.17        | 78.68        | 82.57        | 74.80        | 71.80        | 72.89        | 66.02        | 72.68        | 64.66        | 63.20        | 83.04        |
| STAGLIENO             | 72.81        | 66.66        | 66.02        | 67.80        | 68.43        | 62.59        | 66.75        | 60.45        | 72.50        | 61.99        | 66.71        | 72.37        |
| STRUPPA               | 83.95        | 79.12        | 99.62        | 84.02        | 89.31        | 54.57        | 66.62        | 82.80        | 78.62        | 77.57        | 73.86        | 100.52       |
| VALLE STURLA          | 86.23        | 73.39        | 63.60        | 55.50        | 65.64        | 52.09        | 81.65        | 67.76        | 59.05        | 68.34        | 46.00        | 65.66        |
| VOLTRI                | 85.86        | 68.60        | 79.90        | 57.55        | 78.59        | 68.49        | 81.60        | 58.47        | 57.57        | 67.36        | 74.82        | 94.34        |
| <b>GENOA</b>          | <b>77.66</b> | <b>76.93</b> | <b>74.97</b> | <b>74.24</b> | <b>71.61</b> | <b>67.37</b> | <b>72.72</b> | <b>69.21</b> | <b>69.33</b> | <b>70.36</b> | <b>66.53</b> | <b>81.44</b> |

**Table S7.** Total number of deaths registered by the two sources (municipality and ISTAT).

| Year | No. of deaths - municipality | No. of deaths - ISTAT | Difference % |
|------|------------------------------|-----------------------|--------------|
| 2015 | 8,266                        | 8,376                 | 1.33%        |
| 2016 | 7,941                        | 8,066                 | 1.57%        |
| 2017 | 8,342                        | 8,468                 | 1.51%        |
| 2018 | 8,155                        | 8,226                 | 0.87%        |
| 2019 | 7,998                        | 8,072                 | 0.93%        |
| 2020 | 9,971                        | 10,031                | 0.60%        |

Figure S1. Distribution of Genoa population by age and sex, 1<sup>st</sup> January 2021.

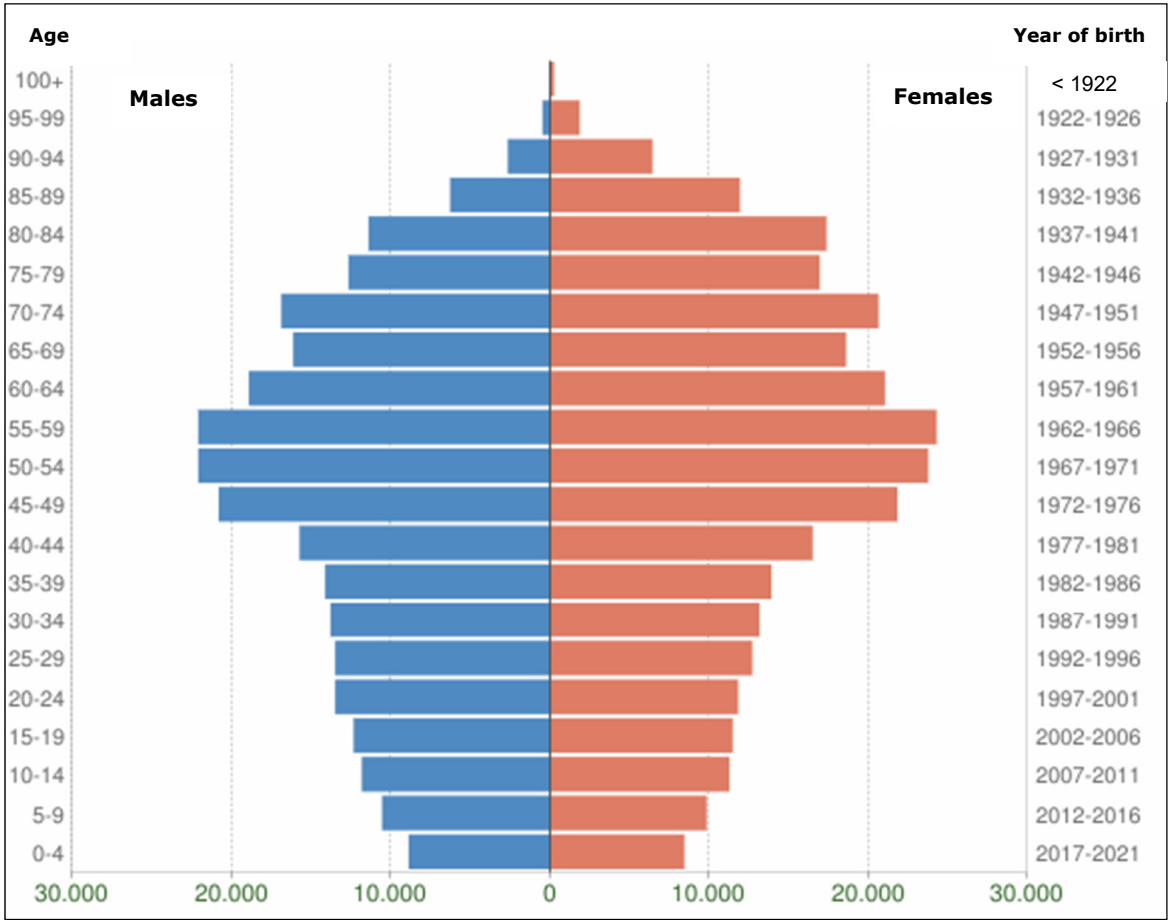

Source: ISTAT – Elaboration: Tuttitalia.it.

Figure S2. Population structure 1st January 2021, Genoa vs. Italy.

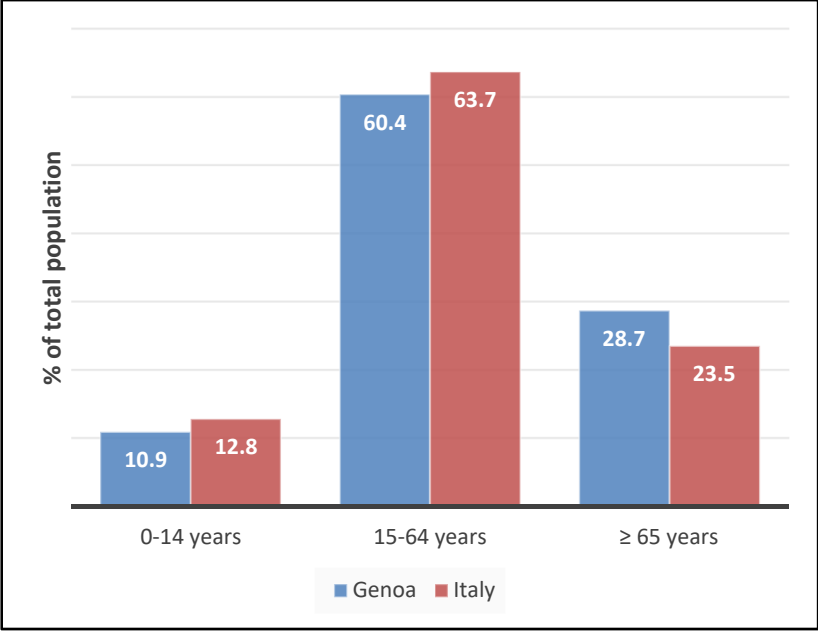

Source: ISTAT.
